# Supplementary material
Source: HighWire-hosted journal article supplement (https://erj.ersjournals.com/content/53/2/1800973)
Supplement: inline-supplementary-material-1 [file inline-supplementary-material-1.pdf]

## Online Supplemental Material

### Fibroblast Growth Factor-21 Predicts Outcome in Community-Acquired Pneumonia

#### Contents

|                                                                                                                                                                                                       |    |
|-------------------------------------------------------------------------------------------------------------------------------------------------------------------------------------------------------|----|
| 1. Figure S1. FGF21 levels and clinical outcomes .....                                                                                                                                                | 2  |
| 2. Figure S2. FGF21 and Pneumonia Severity Index at Emergency Admission.....                                                                                                                          | 3  |
| 3. Figure S3. FGF21 and Procalcitonin at Emergency Admission.....                                                                                                                                     | 4  |
| 4. Figure S4. FGF21 and C-reactive protein at Emergency Admission .....                                                                                                                               | 5  |
| 5. Figure S5. FGF21 and Body Temperature at Emergency Admission.....                                                                                                                                  | 6  |
| 6. Figure S6. FGF21 and Pneumonia Severity Index (PSI) .....                                                                                                                                          | 7  |
| 7. Figure S7. Effects of Corticosteroids on FGF21 levels .....                                                                                                                                        | 8  |
| 8. Figure S8. FGF21 and Glucose levels at Emergency Admission .....                                                                                                                                   | 9  |
| 9. Table S1. Baseline characteristics of the ProCAP and STEP cohorts.....                                                                                                                             | 10 |
| 10. Table S2a. Baseline characteristics of young healthy volunteers.....                                                                                                                              | 11 |
| 11. Table S2b. Baseline characteristics of older healthy volunteers.....                                                                                                                              | 11 |
| 12. Table S3. FGF21 and Pneumonia severity index to predict 30-day mortality:<br>Sensitivity, Specificity, Positive likelihood ratio, and negative likelihood ratio at various<br>cutoff values ..... | 12 |
| 13. Table S4. Diagnostic accuracy to discriminate among low-risk (PSI I-III) versus<br>high-risk (PSI IV-V) in community-acquired pneumonia .....                                                     | 12 |
| 14. Table S5. FGF21 and clinical outcomes in STEP trial .....                                                                                                                                         | 13 |
| 15. Table S6. FGF21 clinical outcomes in ProCAP trial .....                                                                                                                                           | 14 |
| 16. References .....                                                                                                                                                                                  | 15 |

## 1. Figure S1. FGF21 levels and clinical outcomes

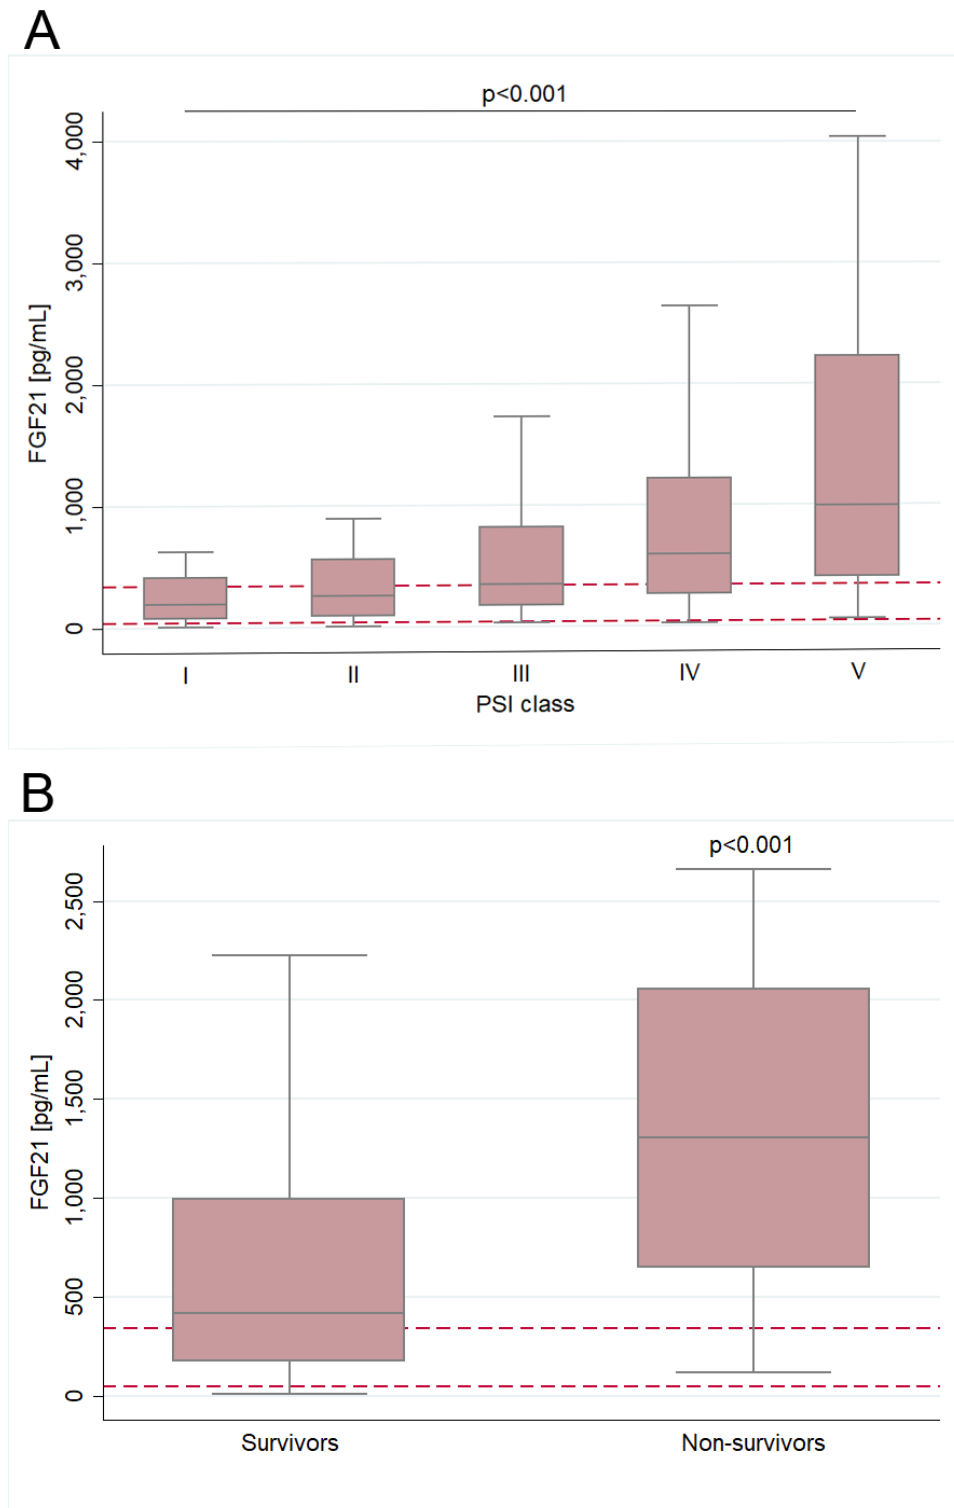

Boxplots for levels of FGF21 at baseline stratified by PSI classes (A) and between Survivors and Non-Survivors (B) for the combined population of ProCAP trial cohort and STEP trial cohort..

## 2. Figure S2. FGF21 and Pneumonia Severity Index at Emergency Admission

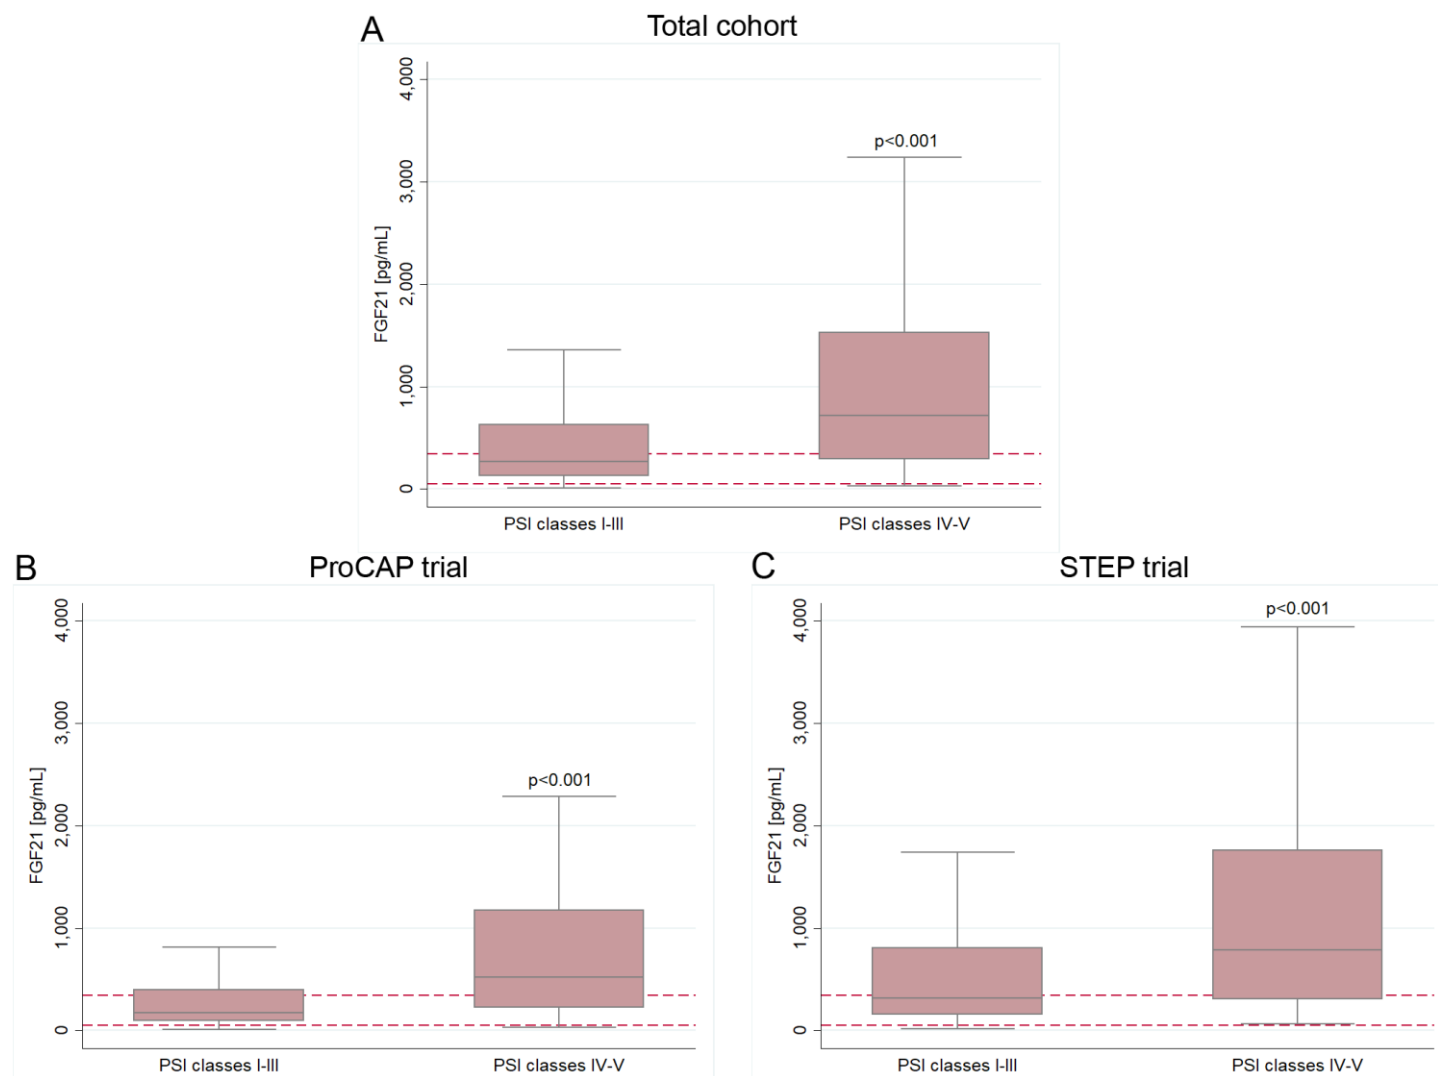

Boxplots for levels of FGF21 at baseline stratified by PSI classes I-III (low-risk) versus PSI classes IV-V (high-risk) for the pooled cohort (A), for the ProCAP trial (B) and for the STEP trial cohort (C).

### 3. Figure S3. FGF21 and Procalcitonin at Emergency Admission

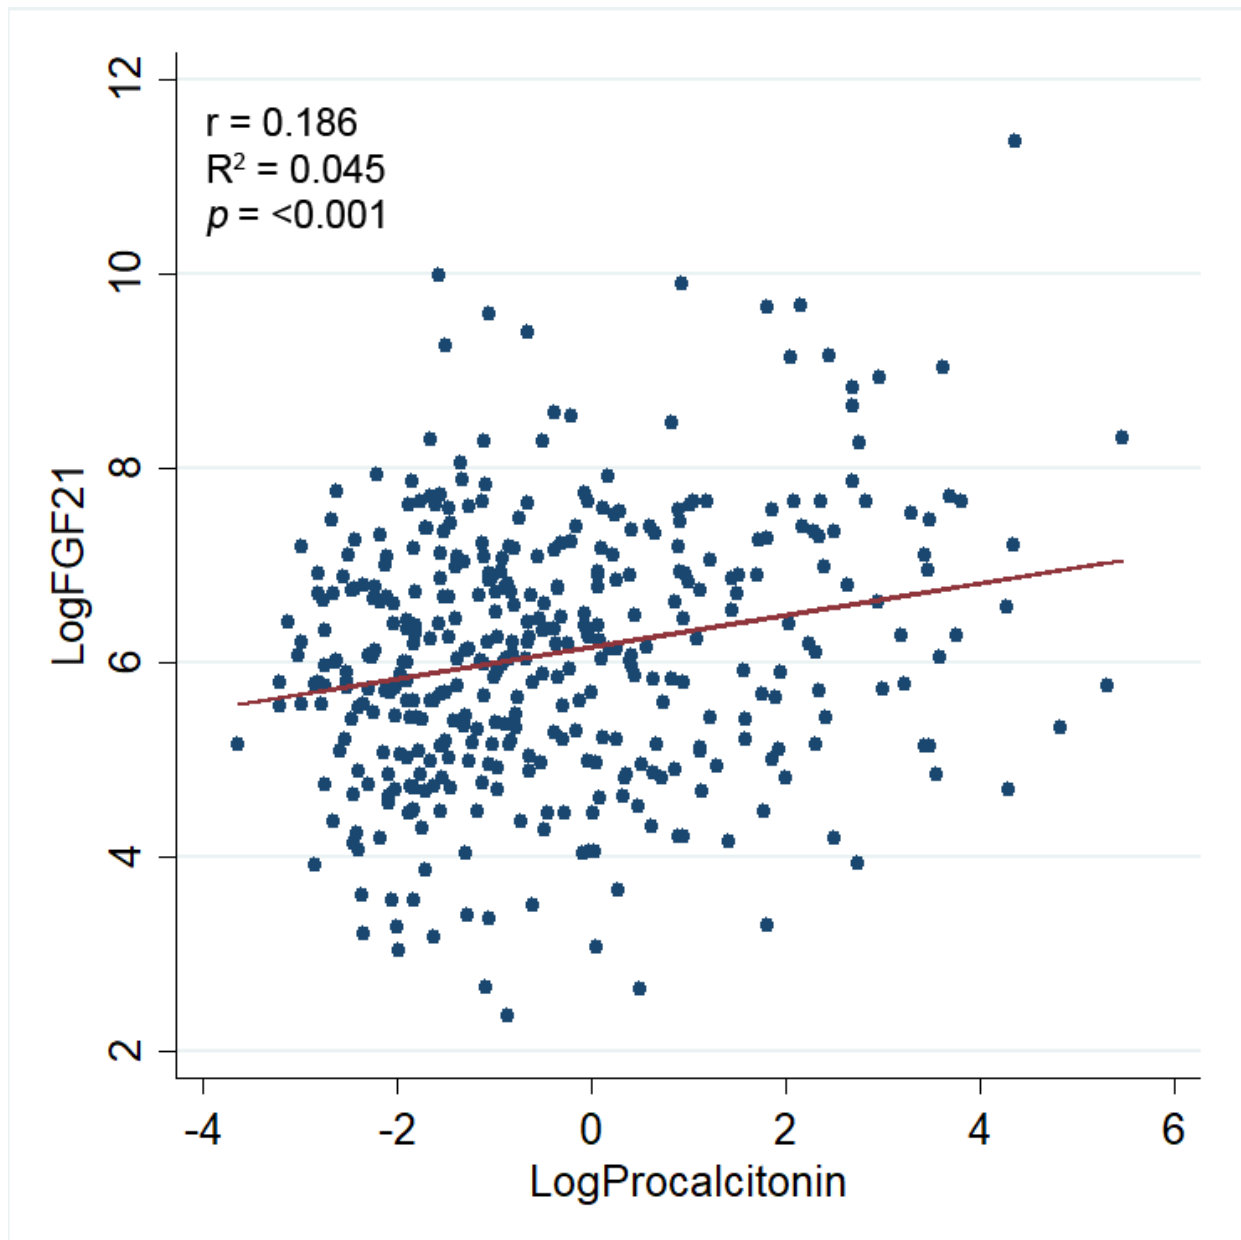

Scatter plot with fitted linear regression line for baseline levels of log-transformed Fibroblast Growth Factor-21 (FGF21) and log-transformed procalcitonin levels at emergency admission. There is a significant correlation between these two inflammatory parameters ( $r=0.186$ ,  $R^2$  0.045;  $p<0.001$ ).

#### 4. Figure S4. FGF21 and C-reactive protein at Emergency Admission

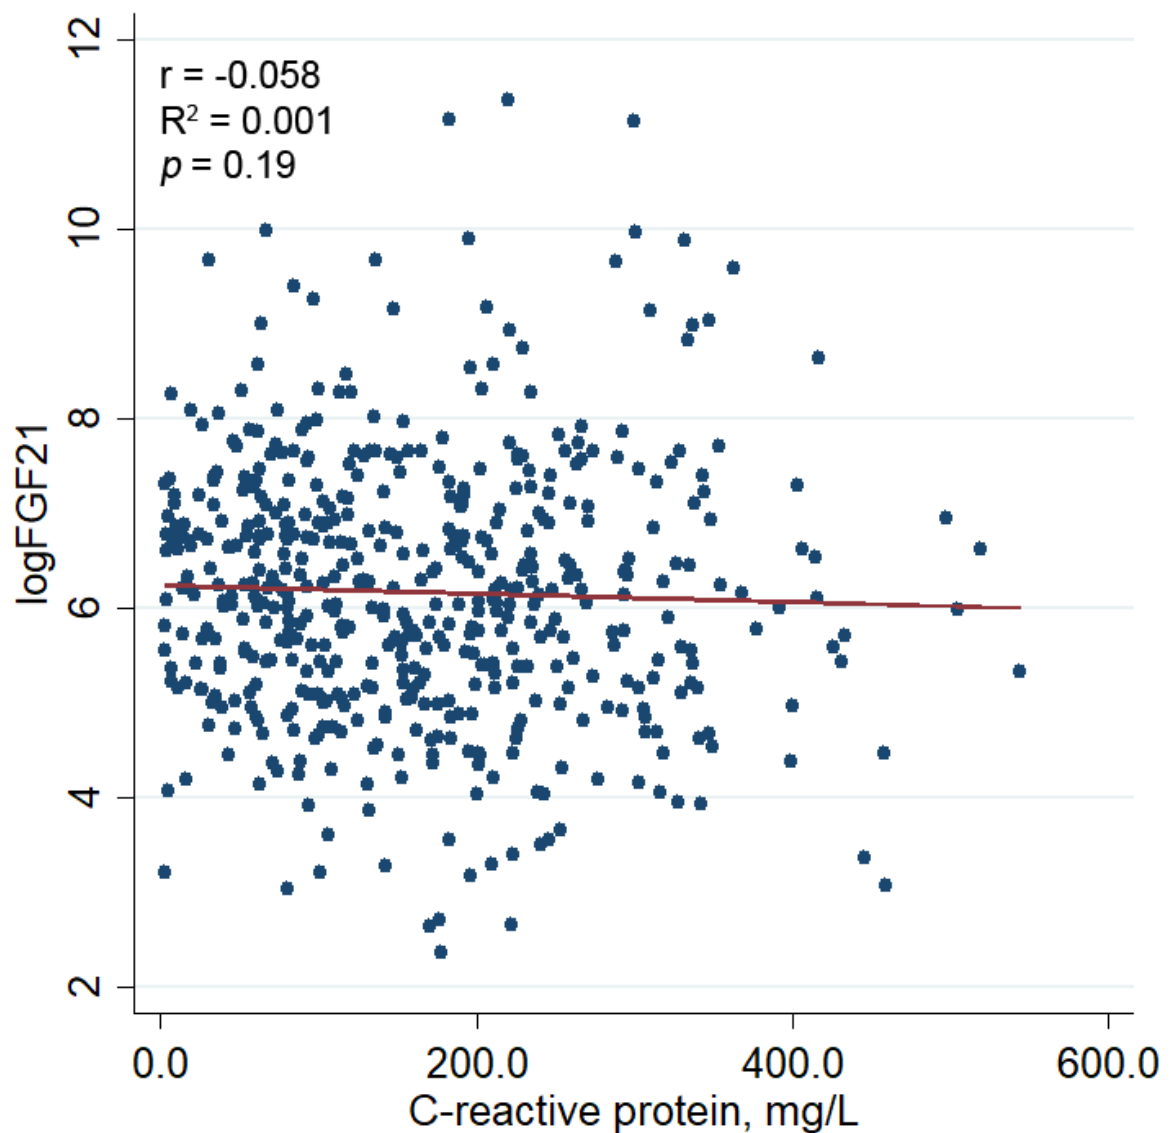

Scatter plot with fitted linear regression line for baseline levels of log-transformed Fibroblast Growth Factor-21 (FGF21) and c-reactive protein levels at emergency admission. There is no significant correlation between these parameters.

## 5. Figure S5. FGF21 and Body Temperature at Emergency Admission

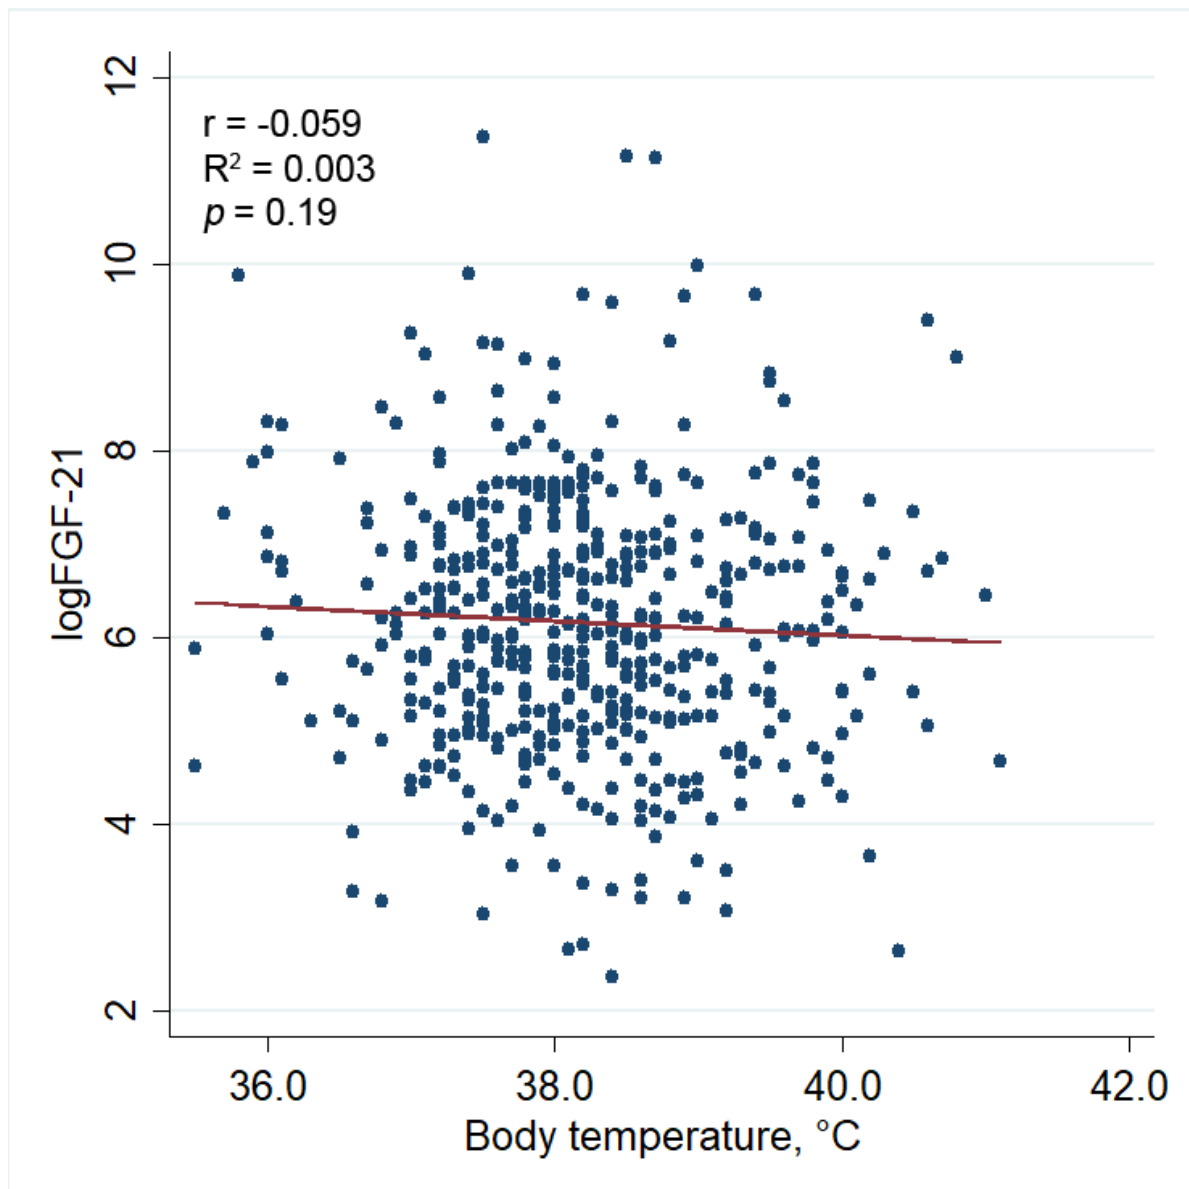

Scatter plot with fitted linear regression line for baseline levels of log-transformed Fibroblast Growth Factor-21 (FGF21) and body temperature at emergency admission. There is no significant correlation between these parameters.

6. Figure S6. FGF21 and Pneumonia Severity Index (PSI)

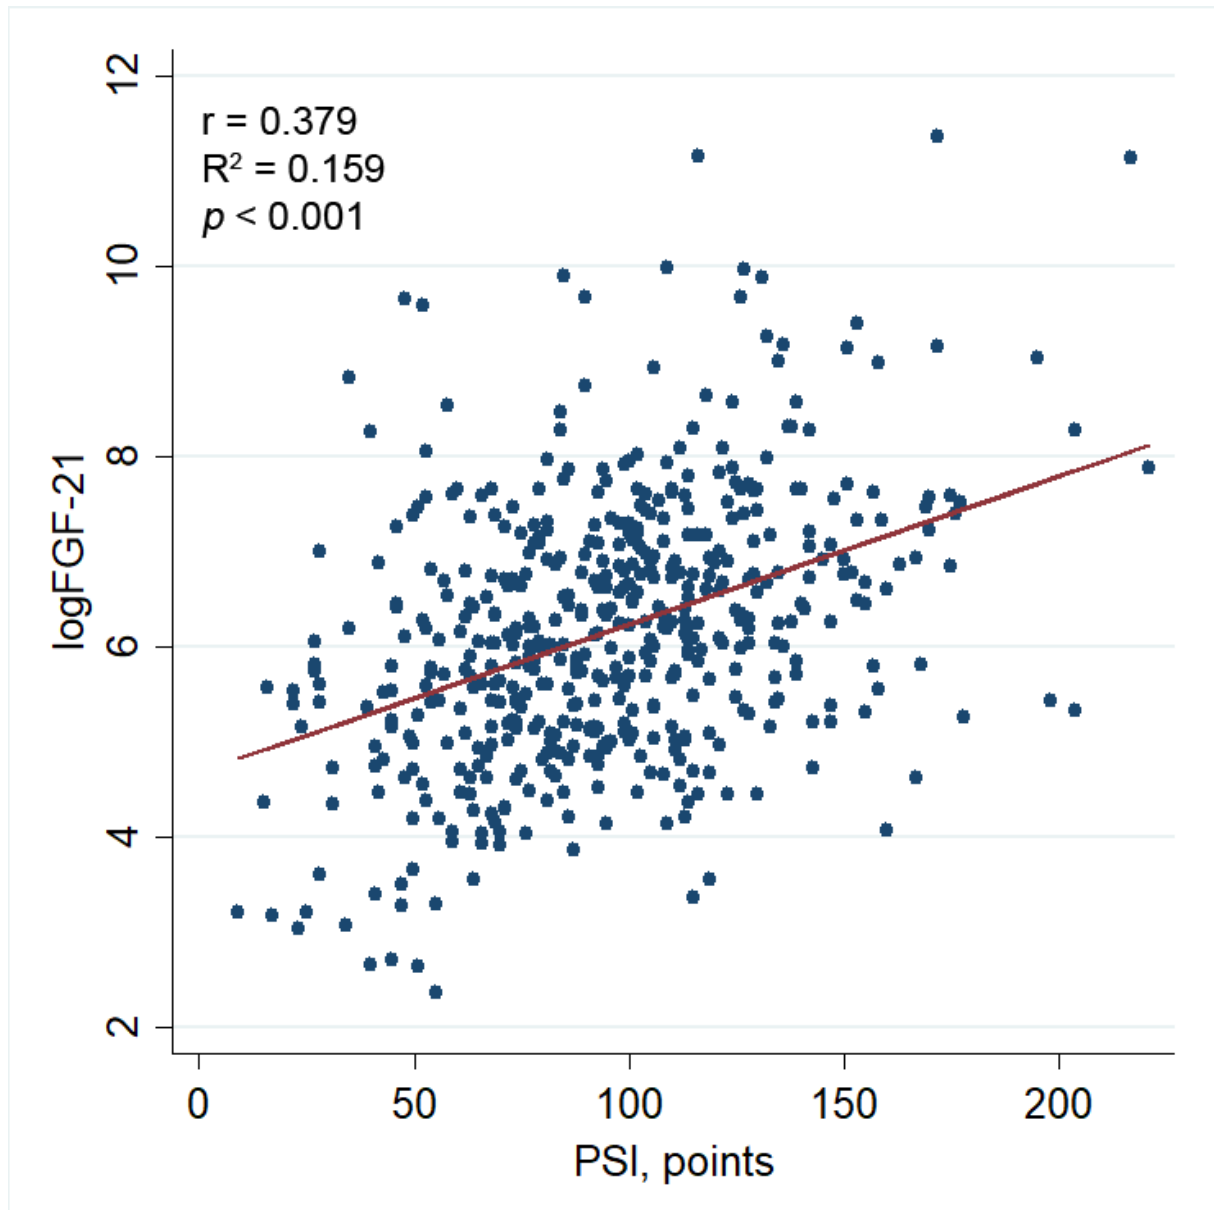

Scatter plot with fitted linear regression line for baseline levels of log-transformed Fibroblast Growth Factor-21 (FGF21) and Pneumonia Severity Index (PSI) of the pooled total cohort (ProCAP and STEP trials), revealing a significant positive correlation of FGF21 with disease severity.

## 7. Figure S7. Effects of Corticosteroids on FGF21 levels

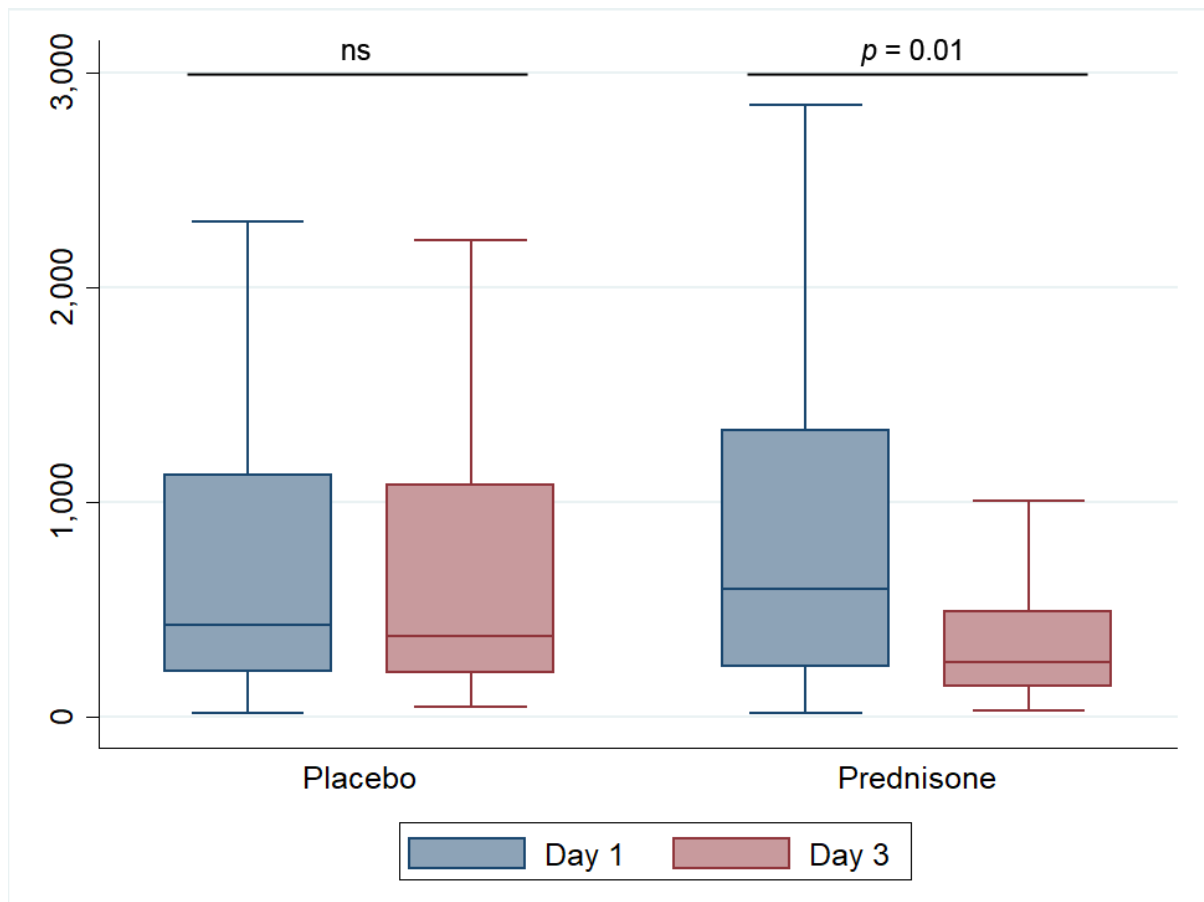

Box plots for levels of Fibroblast Growth Factor-21 (FGF21 in pg/mL) at emergency admission (blue) and day 3 (red) stratified by randomized treatment (Placebo vs. Prednisone). There was a significant decrease in FGF21 levels at day 3 upon treatment with prednisone 50mg per day.



## 8. Figure S8. FGF21 and Glucose levels at Emergency Admission

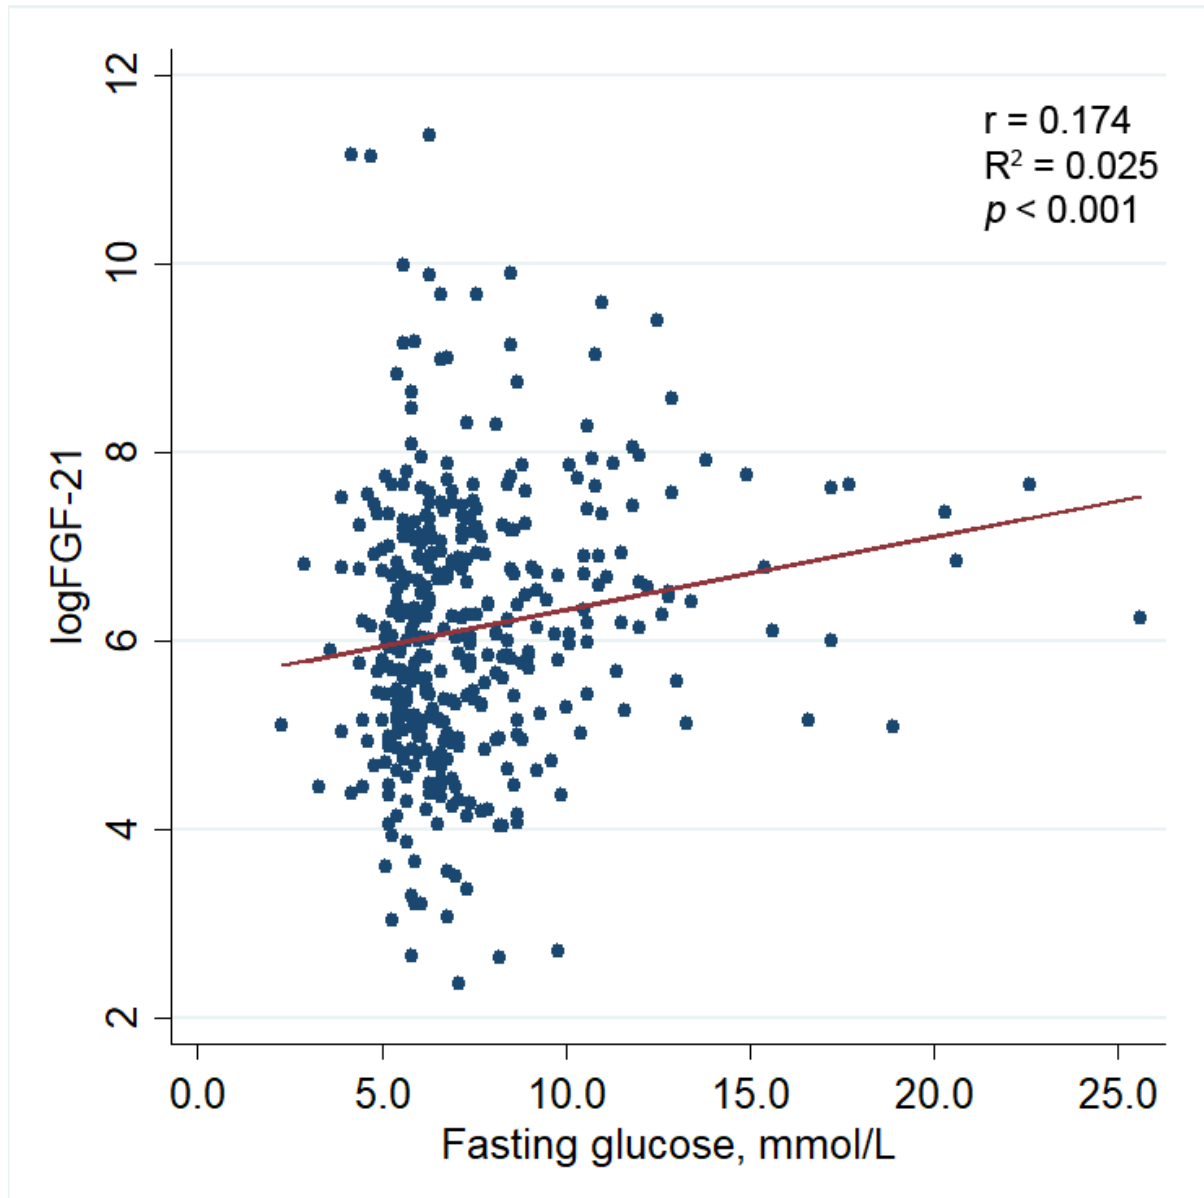

Scatter plot with fitted linear regression line for baseline levels of log-transformed Fibroblast Growth Factor-21 (FGF21) and glucose levels at emergency admission of the pooled total cohort (ProCAP and STEP trials), revealing a significant positive correlation of FGF21 with plasma glucose.

**9. Table S1. Baseline characteristics of the ProCAP and STEP cohorts**

| Characteristic/variable        | Total cohort<br>(n=509) | ProCAP trial<br>(n=150) | STEP trial<br>(n=359) |
|--------------------------------|-------------------------|-------------------------|-----------------------|
| <b>General characteristics</b> |                         |                         |                       |
| Age, years                     | 75 (61, 83)             | 73.0 (56.0, 82.0)       | 75 (62, 83)           |
| Male sex                       | 320 (62.9%)             | 93 (62.0%)              | 227 (63.2%)           |
| BMI, kg/m <sup>2</sup>         | 26.0 (23.0, 29.3)       | 24.8 (22.2, 28.7)       | 26.1 (23.0, 29.4)     |
| Smoking status                 | 118 (23.2%)             | 32 (21.3%)              | 86 (24.0%)            |
| Packyears, years               | 20.0 (0.0, 40.0)        | 30.0 (20.0, 50.0)       | 10.0 (0.0, 40.0)      |
| <b>Comorbidities</b>           |                         |                         |                       |
| Diabetes mellitus              | 117 (23.0%)             | 35 (23.3%)              | 82 (22.8%)            |
| COPD                           | 100 (19.6%)             | 32 (21.3%)              | 68 (18.9%)            |
| Asthma                         | 21 (4.1%)               | 3 (2.0%)                | 18 (5.0%)             |
| Heart failure                  | 83 (16.3%)              | 9 (6.0%)                | 74 (20.6%)            |
| Cerebrovascular disease        | 44 (8.6%)               | 9 (6.0%)                | 35 (9.7%)             |
| Renal insufficiency            | 165 (32.4%)             | 34 (22.7%)              | 131 (36.5%)           |
| Neoplastic disease             | 41 (8.1%)               | 23 (15.3%)              | 18 (5.0%)             |
| Antibiotic pre-treatment       | 109 (21.4%)             | 31 (20.7%)              | 78 (21.7%)            |
| <b>Clinical variables</b>      |                         |                         |                       |
| Systolic blood pressure, mmHg  | 125.0 (110.0, 140.0)    | 130.0 (113.0, 142.0)    | 124.0 (110.0, 140.0)  |
| Heart rate, bpm                | 88.0 (76.0, 101.0)      | 96.0 (84.0, 108.0)      | 85.0 (74.0, 98.0)     |
| Respiratory rate, breaths/min  | 21.0 (18.0, 25.0)       | 22.0 (18.0, 27.0)       | 20.0 (18.0, 24.0)     |
| Body temperature, °C [in-ear]  | 38.1 (37.5, 38.7)       | 38.5 (37.7, 39.3)       | 38.0 (37.4, 38.6)     |
| SIRS, points.                  | 2 (2, 3)                | 3 (2, 4)                | 2 (2, 3)              |
| PSI class <sup>†</sup>         |                         |                         |                       |
| I, II and III                  | 227 (44.6%)             | 64 (42.7%)              | 163 (45.4%)           |
| IV and V                       | 282 (55.4%)             | 86 (57.3%)              | 196 (54.6%)           |
| PSI, points <sup>†</sup>       | 95 (71, 118)            | 95 (71, 115)            | 95 (71, 118)          |
| <b>Laboratory values</b>       |                         |                         |                       |
| C-reactive protein, mg/L       | 153.0 (80.0, 233.0)     | 135.5 (74.0, 216.4)     | 153.6 (80.1, 240.0)   |
| Procalcitonin, ng/dL           | 0.4 (0.2, 1.9)          | 0.4 (0.2, 1.4)          | 0.4 (0.2, 2.5)        |
| White blood cell count, G/L    | 12.2 (8.8, 15.4)        | 12.8 (9.0, 15.4)        | 12.0 (8.7, 15.4)      |
| Fasting glucose, mmol/L        | 6.6 (5.7, 8.4)          | 6.8 (5.8, 8.7)          | 6.6 (5.7, 7.8)        |

Data are presented as median (interquartile range) or n (%), unless otherwise stated. BMI: body mass index; COPD: chronic obstructive pulmonary disease; SIRS: systemic inflammatory response syndrome; PSI: Pneumonia Severity Index. <sup>†</sup> The PSI is a clinical prediction rule to calculate the probability of morbidity and mortality in patients with community-acquired pneumonia [1]; PSI risk class I corresponds to age ≤50 years and no risk factors (≤50 points), risk class II to 51–70 points, risk class III to 71–90 points, risk class IV to 91–130 points and risk class V to >130 points.

**10. Table S2a. Baseline characteristics of young healthy volunteers**

| Characteristic/variable |        | Total cohort (n=56) |
|-------------------------|--------|---------------------|
| Sex                     | Female | 11 (20%)            |
|                         | Male   | 45 (80%)            |
| Age, years              |        | 24 (22, 29.5)       |
| Weight, kg              |        | 74.5 (68.5, 79.1)   |
| Height, cm              |        | 179.5 (173, 183)    |
| BMI, kg/m <sup>2</sup>  |        | 23.1 (21.5, 24.7)   |
| FGF21, pg/mL            |        | 50.4 (13.7, 113.3)  |

Data are presented as median (IQR) for continuous or n (%) for categorical variables. BMI, body mass index.

**11. Table S2b. Baseline characteristics of older healthy volunteers**

| Characteristic/variable  |        | Total cohort (n=56) |
|--------------------------|--------|---------------------|
| Sex                      | Female | 28 (70%)            |
|                          | Male   | 12 (30%)            |
| Age, years               |        | 64 (59.5, 71.5)     |
| Weight, kg               |        | 64.5 (57.5, 78.1)   |
| Height, cm               |        | 166 (160, 169)      |
| BMI, kg/m <sup>2</sup>   |        | 23.4 (21.3, 26.2)   |
| C-reactive protein, mg/L |        | 1.0 (0.4, 1.6)      |
| FGF21, pg/mL             |        | 140.2 (81.1, 161.8) |

Data are presented as median (IQR) for continuous or n (%) for categorical variables. BMI, body mass index.

**12. Table S3. FGF21 and Pneumonia severity index to predict 30-day mortality: Sensitivity, Specificity, Positive likelihood ratio, and negative likelihood ratio at various cutoff values**

| <b>Cutoff</b> | <b>Sensitivity</b> | <b>Specificity</b> | <b>LR+</b> | <b>LR-</b> |
|---------------|--------------------|--------------------|------------|------------|
| FGF21         |                    |                    |            |            |
| 386           | 90.6               | 46.8               | 1.7        | 0.2        |
| 669           | 75.0               | 62.7               | 2.0        | 0.4        |
| 1933          | 31.3               | 86.6               | 2.3        | 0.8        |
| PSI           |                    |                    |            |            |
| 95            | 90.6               | 52.4               | 1.9        | 0.2        |
| 102           | 84.4               | 60.6               | 2.1        | 0.3        |
| 134           | 31.3               | 87.6               | 2.5        | 0.8        |

*Definition of abbreviations:* FGF21 = Fibroblast growth factor-21; LR+ = positive likelihood ratio; LR- = negative likelihood ratio; PSI = pneumonia severity index.

**13. Table S4. Diagnostic accuracy to discriminate among low-risk (PSI I-III) versus high-risk (PSI IV-V) in community-acquired pneumonia**

| <b>Parameter</b>       | <b>AUC</b> | <b>95% CI</b> | <b>p Value (vs. FGF21)</b> |
|------------------------|------------|---------------|----------------------------|
| FGF21                  | 0.68       | 0.64–0.73     | –                          |
| C-reactive Protein     | 0.48       | 0.43–0.53     | <0.001                     |
| Procalcitonin          | 0.56       | 0.51–0.62     | 0.02                       |
| White blood cell count | 0.46       | 0.41–0.51     | <0.001                     |

*Definition of abbreviations:* AUC = area under the curve; CI = confidence interval; FGF21 = Fibroblast growth factor-21; PSI = pneumonia severity index.

**14. Table S5. FGF21 and clinical outcomes in STEP trial**

|                                              |                              |                           | Regression Analysis of<br>Baseline FGF21                           |                  |                                                                                   |                |
|----------------------------------------------|------------------------------|---------------------------|--------------------------------------------------------------------|------------------|-----------------------------------------------------------------------------------|----------------|
|                                              | <u>Tertiles 1-2</u><br>n=240 | <u>Tertile 3</u><br>n=119 | Univariate regression<br>analysis, OR, HR,<br>coefficient (95% CI) | <i>p</i> value   | Multivariable<br>adjusted regression<br>analysis, OR, HR,<br>coefficient (95% CI) | <i>p</i> value |
| Death (30-days)                              | 5 (2.1%)                     | 10 (8.4%)                 | <b>1.53 (1.09, 2.14)</b>                                           | <b>0.01</b>      | 1.53 (0.99, 2.36)                                                                 | 0.05           |
| Time to effective hospital discharge, days   | 7.0 (6.0-8.0)                | 10.0 (8.0-11.0)           | <b>0.85 (0.78, 0.92)</b>                                           | <b>&lt;0.001</b> | <b>0.87 (0.80, 0.95)</b>                                                          | <b>0.001</b>   |
| Total duration of antibiotic treatment, days | 10.0 (8.0-13.0)              | 11.0 (8.0-14.0)           | <b>0.54 (0.11, 0.98)</b>                                           | <b>0.01</b>      | 0.35 (-0.12, 0.82)                                                                | 0.15           |
| Intravenous antibiotic treatment, days       | 5.0 (3.0-7.0)                | 6.0 (5.0-9.0)             | <b>0.97 (0.55, 1.40)</b>                                           | <b>&lt;0.001</b> | <b>0.78 (0.31, 1.24)</b>                                                          | <b>0.001</b>   |
| ICU admission                                | 17 (7.1%)                    | 17 (14.3%)                | <b>1.45 (1.14, 1.85)</b>                                           | <b>0.003</b>     | <b>1.39 (1.06, 1.81)</b>                                                          | <b>0.02</b>    |
| TTCS <sup>d</sup> , days                     | 4.0 (2.0-7.4)                | 6.0 (3.0-10.0)            | <b>0.87 (0.80, 0.94)<sup>a</sup></b>                               | <b>&lt;0.001</b> | <b>0.87 (0.80, 0.95)<sup>a</sup></b>                                              | <b>0.002</b>   |
| CAP complications <sup>e</sup>               | 73 (30.4%)                   | 53 (44.5%)                | <b>1.23 (1.05, 1.45)<sup>b</sup></b>                               | <b>0.01</b>      | 1.14 (0.96, 1.36) <sup>b</sup>                                                    | 0.15           |

Data are median (IQR) or *n* (%) unless otherwise stated and adjusted for age, gender, diabetes mellitus, congestive heart failure and renal insufficiency; FGF21 values were log transformed. <sup>a</sup> Hazard ratio, <sup>b</sup> Odds ratio, <sup>c</sup> Regression coefficient. ICU=intensive care unit.

<sup>d</sup> TTCS Time to clinical stability defined as defined as time to clinical stabilization of vital signs at two consecutive measurements  $\geq 12$  h apart.

<sup>e</sup> CAP complications defined as recurrence; acute respiratory distress syndrome; empyema; nosocomial infections until day 30; serious adverse events possibly related to CAP; ICU stay; re-admission to hospital.

**15. Table S6. FGF21 clinical outcomes in ProCAP trial**

|                                              |                              |                          | Regression Analysis of Baseline FGF21                        |                  |                                                                          |                |
|----------------------------------------------|------------------------------|--------------------------|--------------------------------------------------------------|------------------|--------------------------------------------------------------------------|----------------|
|                                              | <u>Tertiles 1-2</u><br>n=100 | <u>Tertile 3</u><br>n=50 | Univariate regression analysis, OR, HR, coefficient (95% CI) | <i>p</i> value   | Multivariable adjusted regression analysis, OR, HR, coefficient (95% CI) | <i>p</i> value |
| Death (30-days)                              | 5 (5.0%)                     | 12 (24.0%)               | <b>2.31 (1.45, 3.69)</b>                                     | <b>&lt;0.001</b> | <b>2.13 (1.30, 3.48)</b>                                                 | <b>0.002</b>   |
| Time to effective hospital discharge, days   | 11.0 (9.0-15.0)              | 13.0 (10.0-14.0)         | 0.91 (0.79, 1.03)                                            | 0.13             | 0.90 (0.79, 1.03)                                                        | 0.13           |
| Total duration of antibiotic treatment, days | 9.0 (5.0-13.0)               | 10.0 (4.0-14.0)          | 0.84 (-0.39, 1.72)                                           | 0.06             | 1.00 (0.01, 1.99)                                                        | 0.05           |
| Intravenous antibiotic treatment, days       | 4.5 (3.0-6.0)                | 4.5 (3.0-6.5)            | 0.12 (-0.64, 0.60)                                           | 0.96             | 0.18 (-0.61, 0.98)                                                       | 0.64           |
| ICU admission                                | 13 (13.0%)                   | 7 (14.0%)                | 1.30 (0.89, 1.88)                                            | 0.18             | 1.49 (0.97, 2.28)                                                        | 0.07           |

Data are median (IQR) or *n* (%) unless otherwise stated and adjusted for age, gender, diabetes mellitus, congestive heart failure and renal insufficiency; FGF21 values were log transformed. <sup>a</sup> Hazard ratio, <sup>b</sup> Odds ratio, <sup>c</sup> Regression coefficient. ICU=intensive care unit.

## 16. References

- 1 Fine MJ, Auble TE, Yealy DM, Hanusa BH, Weissfeld LA, Singer DE, Coley CM, Marrie TJ, Kapoor WN. A prediction rule to identify low-risk patients with community-acquired pneumonia. *The New England journal of medicine* 1997; 336: 243–250.
